# Supplementary material for: Depletion of nuclear import protein karyopherin alpha 7 (KPNA7) induces mitotic defects and deformation of nuclei in cancer cells
Source: PubMed Central journal article supplement (PMC5870926; doi:10.1186/s12885-018-4261-5), 2018-03-27
Supplement: 12885_2018_4261_MOESM3_ESM.pdf [file 12885_2018_4261_MOESM3_ESM.pdf]

A

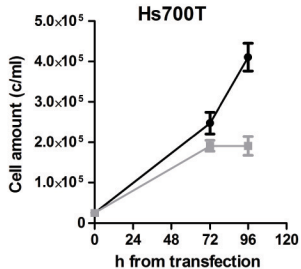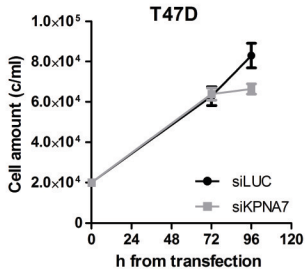

B

| Cell line     | Silencing efficiency (%) |     |     |     |
|---------------|--------------------------|-----|-----|-----|
|               | 24h                      | 48h | 72h | 96h |
| <b>Hs700T</b> | 86                       | 89  | 85  | 76  |
| <b>T-47D</b>  | 87                       | 78  | 60  | 45  |
