# Supplementary material for: Depletion of nuclear import protein karyopherin alpha 7 (KPNA7) induces mitotic defects and deformation of nuclei in cancer cells
Source: PubMed Central journal article supplement (PMC5870926; doi:10.1186/s12885-018-4261-5), 2018-03-27

$$AR_{xy} = \frac{\Delta x}{\Delta y}$$

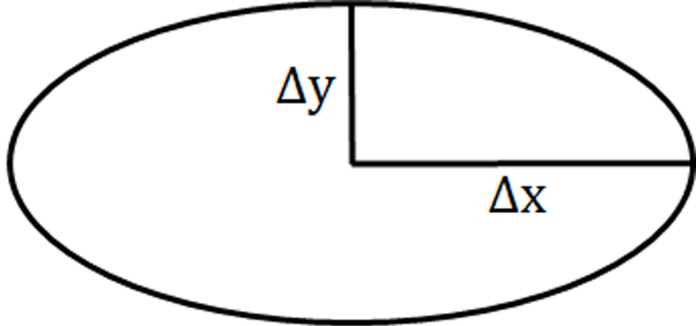

$$AR_{yz} = \frac{\Delta y}{\Delta z}$$

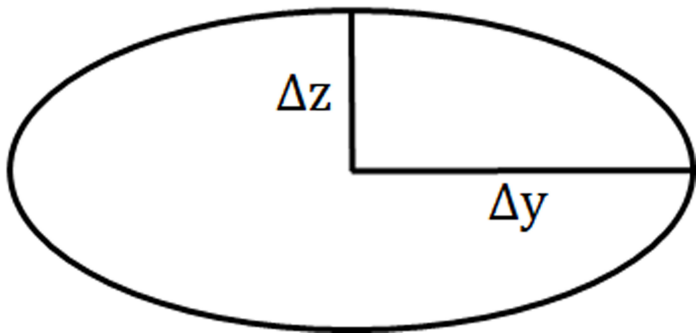

Supplement: 12885_2018_4261_MOESM4_ESM.pdf [file 12885_2018_4261_MOESM4_ESM.pdf]
